# Supplementary material for: Gradient migration hydrogenation of adsorbed hydrogen modulated by anasymmetric configuration of S vacancies with atomic Zn dopant for photocatalytic CO2 methanation
Source: Royal Society of Chemistry journal article supplement (doi:10.1039/d4ta07568d), 2024-12-05
Supplement: d4ta07568d1.pdf [file d4ta07568d1.pdf]

## Supplementary Information

### **Gradient migration hydrogenation of adsorbed hydrogen modulated by asymmetric configuration of S vacancy with atomic Zn dopant for photocatalytic CO<sub>2</sub> methanation**

Hao Shen,<sup>a</sup> Hang Gao,<sup>a</sup> Shuqu Zhang,<sup>\*a</sup> Xia Liu,<sup>\*b</sup> Lixia Yang,<sup>a</sup> Ren-Jie Song,<sup>a</sup> Jian-Ping Zou,<sup>a</sup> Shenglian Luo<sup>a</sup>

<sup>a</sup> Key Laboratory of Jiangxi Province for Persistent Pollutants Prevention Control and Resource Reuse, Nanchang Hangkong University, Nanchang 330063, Jiangxi Province, People's Republic of China

<sup>b</sup> College of Chemistry and Chemical Engineering, Qingdao University, Qingdao 266071, Shandong Province, People's Republic of China

**\*Corresponding authors:**

Email address: [zhangshuqu2013@126.com](mailto:zhangshuqu2013@126.com) (S. Zhang); [Liux918@163.com](mailto:Liux918@163.com) (X. Liu)

## Contents

|                                                                                                                                                                                                                                                                                                                          |           |
|--------------------------------------------------------------------------------------------------------------------------------------------------------------------------------------------------------------------------------------------------------------------------------------------------------------------------|-----------|
| <b>Experimental Section .....</b>                                                                                                                                                                                                                                                                                        | <b>1</b>  |
| <b>Materials and reagents. ....</b>                                                                                                                                                                                                                                                                                      | <b>1</b>  |
| <b>Synthesis of <math>\text{In}_2\text{S}_3</math> and <math>x\text{Zn-In}_{2-x}\text{S}_3</math> (<math>x=1\%\sim 6\%</math>). ....</b>                                                                                                                                                                                 | <b>1</b>  |
| <b>Characterizations. ....</b>                                                                                                                                                                                                                                                                                           | <b>1</b>  |
| <b>Performance evaluation for photocatalytic <math>\text{CO}_2</math> reduction. ....</b>                                                                                                                                                                                                                                | <b>2</b>  |
| <b>Calculation details. ....</b>                                                                                                                                                                                                                                                                                         | <b>3</b>  |
| <b>Supplementary Figures. ....</b>                                                                                                                                                                                                                                                                                       | <b>5</b>  |
| <b>Fig. S1 SEM image of <math>\text{In}_2\text{S}_3</math>. ....</b>                                                                                                                                                                                                                                                     | <b>5</b>  |
| <b>Fig. S2 Nitrogen adsorption – desorption isotherms of <math>\text{In}_2\text{S}_3</math> and <math>x\text{Zn-In}_{2-x}\text{S}_3</math> (<math>x=1\% \sim 5\%</math>). ..</b>                                                                                                                                         | <b>6</b>  |
| <b>Fig. S3 EDS spectra of <math>4\%\text{Zn-In}_{2-x}\text{S}_3</math>. ....</b>                                                                                                                                                                                                                                         | <b>7</b>  |
| <b>Table S1. EDS results of <math>4\%\text{Zn-In}_{2-x}\text{S}_3</math>. ....</b>                                                                                                                                                                                                                                       | <b>8</b>  |
| <b>Fig. S4 XRD pattern of <math>\text{In}_2\text{S}_3</math> and <math>x\text{Zn-In}_{2-x}\text{S}_3</math> (<math>x=1\% \sim 4\%</math>). ....</b>                                                                                                                                                                      | <b>9</b>  |
| <b>Fig. S5 XRD pattern of <math>5\%\text{Zn-In}_{2-x}\text{S}_3</math>. ....</b>                                                                                                                                                                                                                                         | <b>10</b> |
| <b>Fig. S6 Atomic modeling diagram of a single cell of bulk <math>\text{In}_2\text{S}_3</math>: (a) front view. (b) top view. ....</b>                                                                                                                                                                                   | <b>11</b> |
| <b>Fig. S7 Atomic model diagram for surface electrostatic potential over <math>\text{Zn-In}_{2-x}\text{S}_3</math>. ....</b>                                                                                                                                                                                             | <b>12</b> |
| <b>Fig. S8 XPS spectra of full spectrum for <math>\text{In}_2\text{S}_3</math> and <math>4\%\text{Zn-In}_{2-x}\text{S}_3</math>. ....</b>                                                                                                                                                                                | <b>13</b> |
| <b>Fig. S9 High resolution XPS spectra of Zn 2p over <math>x\text{Zn-In}_{2-x}\text{S}_3</math> (<math>x=1\% \sim 5\%</math>). ....</b>                                                                                                                                                                                  | <b>14</b> |
| <b>Table S2. XPS fitting data of area of elements, Zn atomic concentrations, the atomic ratios of S to In and <math>V_s</math> concentrations. The RSF (relative sensitivity factor) for Zn 2p, In 3d and S 2p are 5.589, 7.265 and 0.668 respectively. ....</b>                                                         | <b>15</b> |
| <b>Fig. S10 Zn K-edge EXAFS fitting results of <math>4\%\text{Zn-In}_{2-x}\text{S}_3</math>. ....</b>                                                                                                                                                                                                                    | <b>16</b> |
| <b>Fig. S11 In L-edge EXAFS fitting results of <math>\text{In}_2\text{S}_3</math>. ....</b>                                                                                                                                                                                                                              | <b>17</b> |
| <b>Fig. S12 In L-edge EXAFS fitting results of <math>4\%\text{Zn-In}_{2-x}\text{S}_3</math>. ....</b>                                                                                                                                                                                                                    | <b>18</b> |
| <b>Table S3. Fitting parameters for Zn K-edge and In L-edge EXAFS for the sample. ....</b>                                                                                                                                                                                                                               | <b>19</b> |
| <b>Fig. S13 (a) UV-vis DRS spectra, (b) <math>(\alpha h\nu)^2</math> versus <math>(h\nu)</math> plots, (c) Valence band spectra of X-ray photoelectron spectroscopy and (d) Band structures of <math>\text{In}_2\text{S}_3</math> and <math>x\text{Zn-In}_{2-x}\text{S}_3</math> (<math>x=1\% \sim 5\%</math>). ....</b> | <b>20</b> |
| <b>Fig. S14 (a) PL spectra, TRPL spectra and (c) Photocurrent response of <math>\text{In}_2\text{S}_3</math> and <math>4\%\text{Zn-In}_{2-x}\text{S}_3</math>. ....</b>                                                                                                                                                  | <b>21</b> |
| <b>Table S4. The PL lifetime of <math>\text{In}_2\text{S}_3</math> and <math>1\text{-}6\%\text{Zn-In}_{2-x}\text{S}_3</math>. ....</b>                                                                                                                                                                                   | <b>22</b> |
| <b>Fig. S16 The <math>\text{CH}_4</math> selectivity and the yields of <math>\text{CH}_4</math> and CO over <math>4\%\text{Zn-In}_{2-x}\text{S}_3</math> (1mg catalyst dispersed in 6 mL water), which were obtained from 8 parallel experiments. ....</b>                                                               | <b>23</b> |
| <b>Fig. S17 The <math>\text{CH}_4</math> selectivity and the yields of <math>\text{CH}_4</math> and CO over <math>4\%\text{Zn-In}_{2-x}\text{S}_3</math> (2mg catalyst dispersed in 6 mL water), which were obtained from 8 parallel experiments. ....</b>                                                               | <b>24</b> |
| <b>Fig. S18 The <math>\text{CH}_4</math> selectivity and the yields of <math>\text{CH}_4</math> and CO over <math>4\%\text{Zn-In}_{2-x}\text{S}_3</math> (3mg catalyst dispersed in 6 mL water), which were obtained from 8 parallel experiments. ....</b>                                                               | <b>25</b> |
| <b>Fig. S19 The <math>\text{CH}_4</math> selectivity and the yields of <math>\text{CH}_4</math> and CO over <math>4\%\text{Zn-In}_{2-x}\text{S}_3</math> (1mg catalyst dispersed in 6 mL water), which were obtained from 8 parallel experiments. ....</b>                                                               | <b>26</b> |
| <b>Table S5. The different partial pressure ratios of <math>\text{Ar}/\text{CO}_2</math>. ....</b>                                                                                                                                                                                                                       | <b>27</b> |
| <b>Table S6. Performance comparison with other sulfur-based catalysts for photocatalytic <math>\text{CO}_2</math> reduction reaction without sacrificial agents. (RT: Room Temperature) ....</b>                                                                                                                         | <b>28</b> |

|                                                                                                                                                                                                                                                                                                                                                                                                                                                                                                                                             |    |
|---------------------------------------------------------------------------------------------------------------------------------------------------------------------------------------------------------------------------------------------------------------------------------------------------------------------------------------------------------------------------------------------------------------------------------------------------------------------------------------------------------------------------------------------|----|
| <b>Fig. S20</b> The effect of dispersion concentrations of photocatalyst on photocatalytic performance of water splitting of 4% Zn-In <sub>2-x</sub> S <sub>3</sub> (photocatalyst: 2mg, H <sub>2</sub> O: in 4 ~ 8mL). ....                                                                                                                                                                                                                                                                                                                | 30 |
| <b>Fig. S21</b> Mass spectra of (a) H <sub>2</sub> (m/z=2) and (b) D <sub>2</sub> (m/z=4) produced by 4%Zn-In <sub>2-x</sub> S <sub>3</sub> photocatalysts during the water splitting reaction when H <sub>2</sub> O and D <sub>2</sub> O are used as proton sources, respectively. Mass spectra of (c) CH <sub>4</sub> and (d) CD <sub>4</sub> produced by 4%Zn-In <sub>2-x</sub> S <sub>3</sub> photocatalyst during CO <sub>2</sub> reduction reaction using H <sub>2</sub> O and D <sub>2</sub> O as proton sources, respectively. .... | 31 |
| <b>Fig. S22</b> Cyclic voltammetry of (a) In <sub>2</sub> S <sub>3</sub> and (b) 4%Zn-In <sub>2-x</sub> S <sub>3</sub> in Ar-saturated 0.5M H <sub>2</sub> SO <sub>4</sub> with a scan rate of 10~60mV s <sup>-1</sup> . ....                                                                                                                                                                                                                                                                                                               | 32 |
| <b>Table S7.</b> Intermediate product processes of H <sub>2</sub> O adsorption and activation, and CO <sub>2</sub> hydrogenation and conversion over In <sub>2</sub> S <sub>3</sub> . ....                                                                                                                                                                                                                                                                                                                                                  | 33 |
| <b>Table S8.</b> Intermediate product processes of H <sub>2</sub> O adsorption and activation, and CO <sub>2</sub> hydrogenation and conversion over 4%Zn-In <sub>2-x</sub> S <sub>3</sub> ....                                                                                                                                                                                                                                                                                                                                             | 34 |
| <b>Fig. S23</b> The infrared thermal images of different photocatalyst sample with increasing irradiation time (0 ~ 3 min). (20 mg photocatalyst, 300W Xenon lamps, λ>420 nm, the distance between powders and light: 10 cm) ....                                                                                                                                                                                                                                                                                                           | 35 |
| <b>References</b> .....                                                                                                                                                                                                                                                                                                                                                                                                                                                                                                                     | 36 |

## Experimental Section

**Materials and reagents.** Indium (III) chloride tetrahydrate ( $\text{InCl}_3 \cdot 4\text{H}_2\text{O}$ ), thioacetamide (TAA), Zinc chloride ( $\text{ZnCl}_2$ ) and Ethylene glycol (EG) were obtained from Shanghai Macklin Biochemical Technology Co, Ltd. (China). All chemical reagents were used without further purified in the experiments.

**Synthesis of  $\text{In}_2\text{S}_3$  and  $x\text{Zn-In}_{2-x}\text{S}_3$  ( $x=1\%\sim 6\%$ ).** To synthesize  $\text{In}_2\text{S}_3$  by a simple solvothermal method, 2 mmol of  $\text{InCl}_3 \cdot 4\text{H}_2\text{O}$ , and 3 mmol of TAA were dissolved in 30 mL of EG with continuous stirring for 2 h. Then, the mixture was maintained at 220 °C for 24 h in a 50 mL Teflon-lined autoclave. The orange precipitate was washed by deionized water and ethanol for several times after cooling down to room temperature. Finally, the obtained powders were collected by centrifugation, washed with deionized water and ethanol for several times, and freeze-dried for 12 h. The synthesis method of  $x\text{Zn-In}_{2-x}\text{S}_3$  is as same as  $\text{In}_2\text{S}_3$  expect for  $\text{ZnCl}_2$  addition (the molar ratios of  $\text{Zn}/(\text{Zn} + \text{In})$  were 1, 2, 3, 4, 5, and 6%, and the total number of moles of  $(\text{Zn} + \text{In})$  was 2 mmol, respectively).

**Characterizations.** The morphologies and the element mappings were obtained from a scanning electron microscopy (SEM, ZEISS Sigma 300, Germany). The morphologies and lattice fringes were obtained from a transmission electron microscopy (TEM, JEOL, JEM-2100 F, Japan) with an accelerating voltage of 200 kV. HAADF-STEM images were obtained from a FEI Titan cubed Themis G2 300 TEM/STEM with anaspherical aberration corrector. The crystalline phases composition was characterized by X-ray diffraction (XRD, Bruker D8 Advance, Germany) with Cu K  $\alpha$  ( $\lambda = 1.542 \text{ \AA}$ ). The electronic structures and chemical states of elements were analysis by X-ray photoelectron spectroscopy (XPS, Shimadzu KRATOS AXIS SUPRA +, Japan) with an exciting source of Al K  $\alpha$  (0.1 eV). The extended X-ray absorption fine structure (EXAFS) and X-ray absorption near-edge spectra (XANES) were measured at Sci-go Research Service. The BL14W Beam line at the Shanghai Synchrotron Radiation Facility (SSRF) (Shanghai, China). The EPR measurements

were performed at room temperature using a spectrometer (Bruker, A-300) at 300 K and 9.86 GHz. The BET adsorption and desorption isotherms, pore size distribution was performed on a Belsorp-Mini II analyzer (Japan). The photoluminescence (PL) spectra were obtained and excited at 295 nm by a fluorescence spectrophotometer (Hitachi F4500, Japan) at room temperature. The time-resolved fluorescence spectrofluorometer (TRPL, Edinburgh FS5, Britain) with 320 nm excited wavelength was used to record the fluorescence emission spectra. An integrating sphere-equipped UV-vis spectrophotometer (DRS, Cary 300, America) was used to capture the diffuse reflection spectra (DRS) in the UV-vis range. The photocurrent response was tested in Na<sub>2</sub>SO<sub>4</sub> aqueous solution (0.2 M, pH = 6.8) using an electrochemical workstation (Chenhua Instrument Co., Shanghai, China) with a three-electrode electrochemical system that Ag/AgCl electrode, Pt electrode, and fluoride tin oxide (FTO) with covered as-prepared photocatalysts (active area of 1.0×1.0 cm<sup>2</sup>) were used as the reference electrode, counter electrode, and working electrode, respectively. The preparation process of the working electrode 20 mg photocatalysts were dispersed in 200 μL of ethyl alcohol and 30 μL of Nafion to obtain a suspension after ultrasonic treatment, then coated onto FTO glass substrate uniformly. After that, the coated FTO glass was dried at 60 °C. The transient photocurrent response was also evaluated under visible-light irradiation (the interval is 50 s for light on and off) at a fixed potential of 0.4 V (vs. Ag/AgCl) for 350s. The intermediate products for CO<sub>2</sub> adsorption and reduction were analyzed from *in-situ* Fourier transform infrared spectroscopy (Bruker INVENIO R, Germany). Photothermal mapping images were taken with a thermal infrared imager (FLIR E95-14). The isotope-labeled experiments were performed using D<sub>2</sub>O instead of H<sub>2</sub>O, and the products were analyzed using gas chromatography-mass spectrometry (Agilent 7890A AMETEK DAC 200 MS).

**Performance evaluation for photocatalytic CO<sub>2</sub> reduction.** 300 W Xenon lamp (Microsolar 300, Beijing China Education Au-light Co., Ltd.) was equipped with a 420 nm cutoff wavelength filter as a light source that simulates visible light for photocatalytic CO<sub>2</sub> reduction tests. The performance evaluation of photocatalytic CO<sub>2</sub> reduction was proceeded in a 50 mL quartz tube at atmospheric pressure and ambient

temperature. First, 2 mg of photocatalyst and 6 mL of water were added to a 50 mL quartz tube and sonicated for 1 min to disperse the catalyst; the quartz tube was then purged with high-purity CO<sub>2</sub> gas (99.999%) for 30 mins to completely remove air and injected with 1.0 atm of pure CO<sub>2</sub> (argon pressurization experiments continue to be performed on top of this by passing 0.1~0.8 atm argon gas); finally, the quartz tube is closed with a rubber stopper and sealing film. The reactor was placed under a Xenon lamp for photocatalytic reaction, and the current was 15 A. After reaction, the generated products (CH<sub>4</sub>, CO and O<sub>2</sub>) were analyzed qualitatively and quantitatively by gas chromatograph (FL GC9790II, Zhejiang, China) equipped with flame ionization detector (FID) and thermal conductivity detector (TCD), while ultrahigh-purity argon was used as a carrier gas. The product was qualitatively and quantitatively analyzed by gas chromatography retention time and appearance standard curve method.

**Calculation details.** All calculations were performed by using the VASP package. The Perdew-Burke-Ernzerhof (PBE) within generalized gradient approximation (GGA) treats exchange-correlation functional, while projected augmented wave (PAW) describes the electron-ion interaction. Grimme's zero-damping DFT-D<sub>3</sub> method was used to calculate van der Waals correction. For the plane-wave basis set, a cutoff of  $E_{\text{cut}} = 500$  eV has been used. For bulk In<sub>2</sub>S<sub>3</sub>, Supercells consisting of 3×3×1 In<sub>2</sub>S<sub>3</sub> unit cells were used and Brillouin zones were sampled using a Monkhorst-Pack k-point mesh with a 5×5×1 k-point grid. Meanwhile, the convergence criterion of energy and force within the process of geometric optimization is chosen as 10<sup>-5</sup> eV and 0.01 eV/Å, respectively. A vacuum thickness of 15 angstroms were used to avoid virtual image interactions in all supercell models. The CI-NEB method and dimer method were used to determine transition state of reaction. The activation energy barrier  $E_a$  and reaction energy  $\Delta E_r$  of reaction could be determined as  $E_a = E_{\text{TS}} - E_{\text{IS}}$  and  $\Delta E_r = E_{\text{FS}} - E_{\text{IS}}$  respectively, where  $E_{\text{IS}}$ ,  $E_{\text{FS}}$  and  $E_{\text{TS}}$  are the energy of initial state, final state and transition state, respectively. Vibrational analyses were also carried out to verify transition states and local minimum. The CO<sub>2</sub> reduction reaction performance was evaluated by reaction free-energy change ( $\Delta G$ ) using spin-polarized calculation for each step, as shown in following equation:

$$\Delta G = \Delta E + \Delta E_{\text{ZPE}} - T\Delta S + \Delta G_{\text{pH}} + \Delta G_{\text{U}}$$

where  $\Delta E$  is the difference between adsorption energies of a given group,  $\Delta E_{\text{ZPE}}$  and  $\Delta S$  are the differences in the zero-point energy and the change in entropy between adsorbed state and free-standing state, respectively;  $T$  is the temperature ( $T = 298.15$  K),  $\Delta G_{\text{U}}$  is the contribution of electrode potential ( $U$ ) to shift free energy  $\Delta G$  at applied  $U$ , and  $\Delta G_{\text{pH}}$  is the correction of the  $\text{H}^+$  free energy due to the influence of  $\text{H}^+$  concentration ( $\Delta G_{\text{pH}} = 2.303 \times k_{\text{B}} T \times \text{pH} \approx 0.059 \times \text{pH}$ , where  $k_{\text{B}}$  is Boltzmann constant and  $\text{pH}$  is assumed to be 0 in this work).

## Supplementary Figures

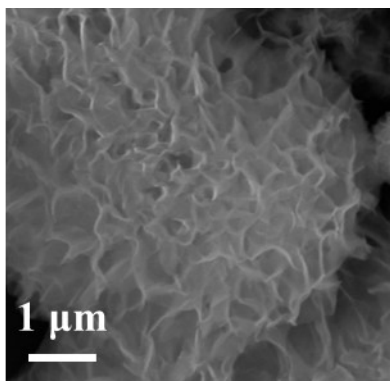

**Fig. S1** SEM image of In<sub>2</sub>S<sub>3</sub>.



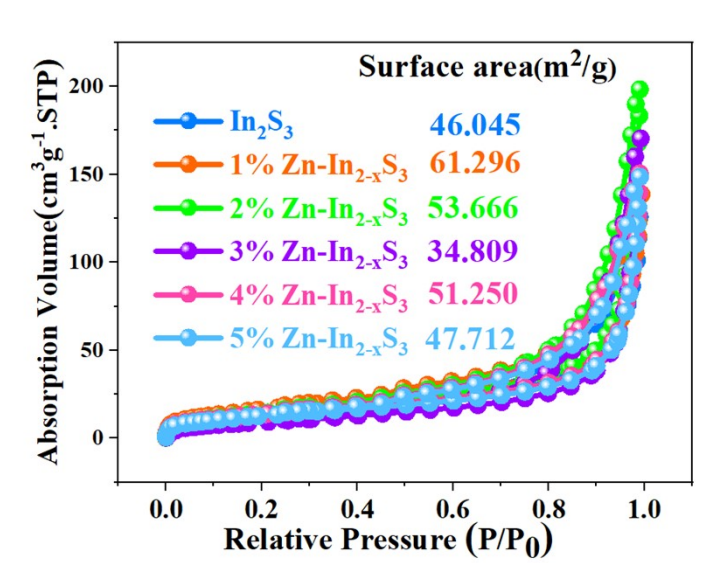

**Fig. S2** Nitrogen adsorption – desorption isotherms of  $\text{In}_2\text{S}_3$  and  $\text{xZn-In}_{2-\text{x}}\text{S}_3$  ( $\text{x}=1\% \sim 5\%$ ).

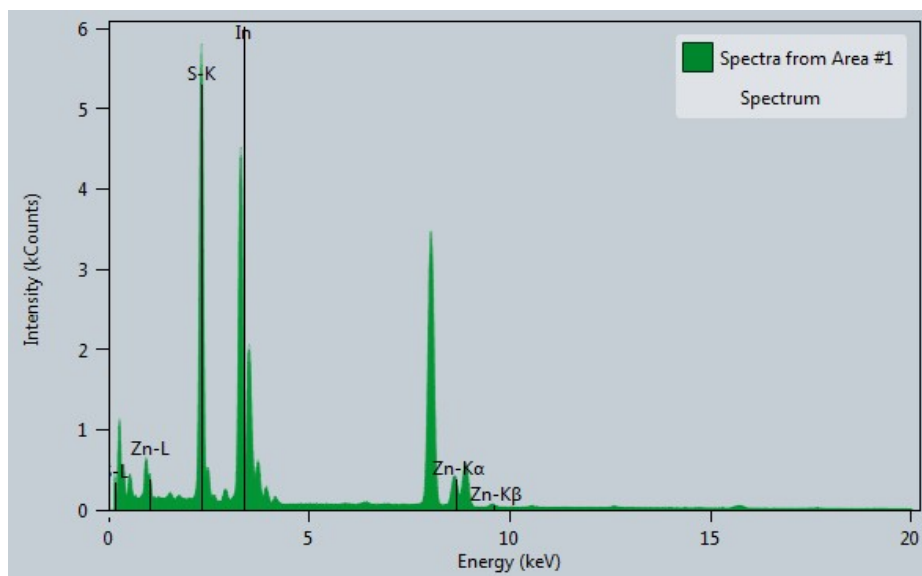

**Fig. S3** EDS spectra of 4%Zn-In<sub>2-x</sub>S<sub>3</sub>.

**Table S1.** EDS results of 4%Zn–In<sub>2</sub>S<sub>3</sub>

| Element | Family | Atomic Fraction (%) | Mass Fraction (%) |
|---------|--------|---------------------|-------------------|
| S       | K      | 58.55               | 29.55             |
| In      | L      | 35.74               | 64.58             |
| Zn      | K      | 5.71                | 5.87              |

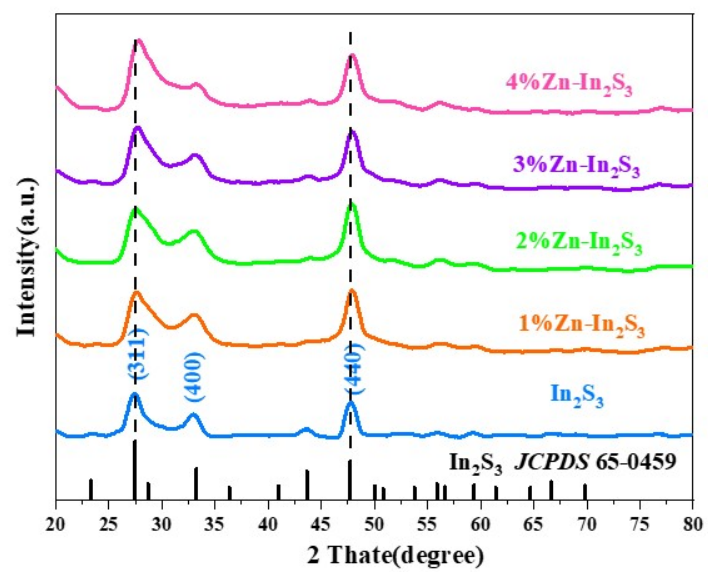

**Fig. S4** XRD pattern of  $\text{In}_2\text{S}_3$  and  $x\text{Zn-In}_{2-x}\text{S}_3$  ( $x=1\% \sim 4\%$ ).

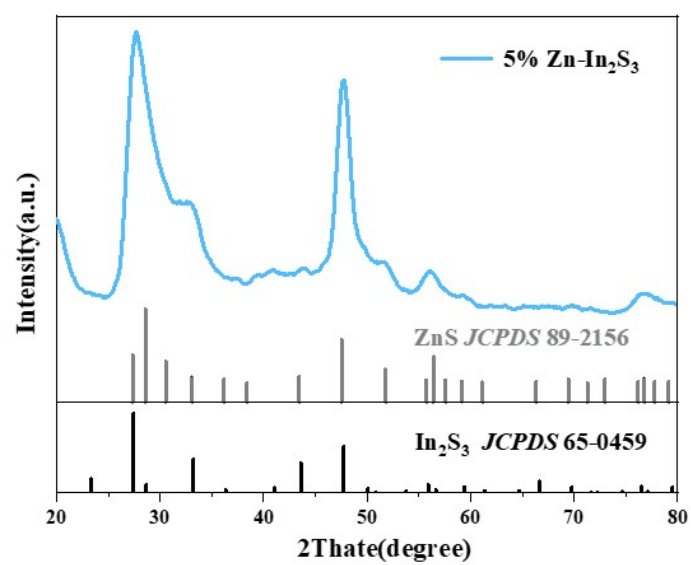

**Fig. S5** XRD pattern of 5%Zn-In<sub>2-x</sub>S<sub>3</sub>.

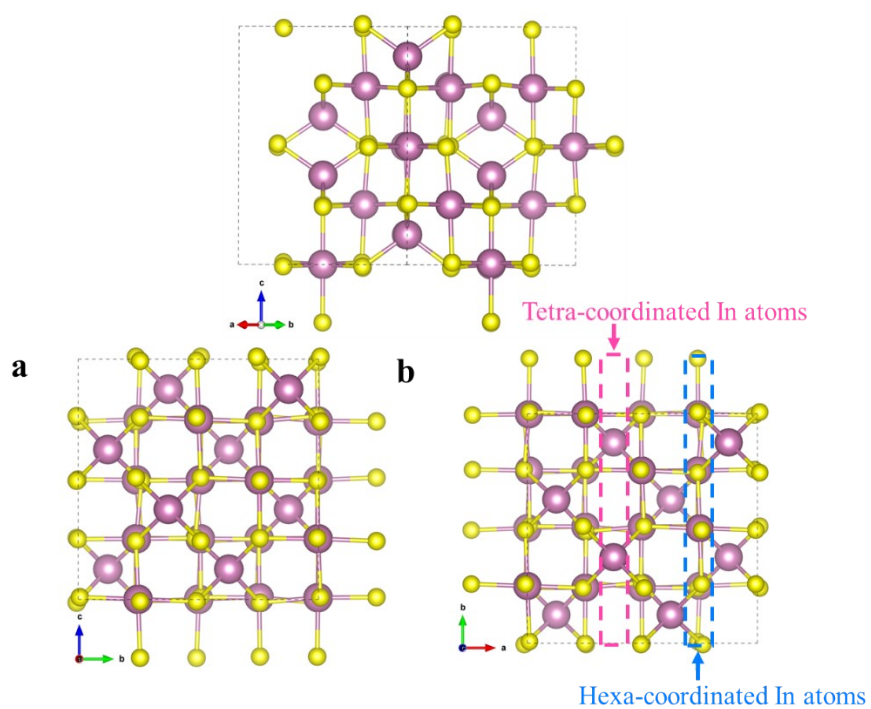

**Fig. S6** Atomic modeling diagram of a single cell of bulk  $\text{In}_2\text{S}_3$  : (a) front view. (b) top view.

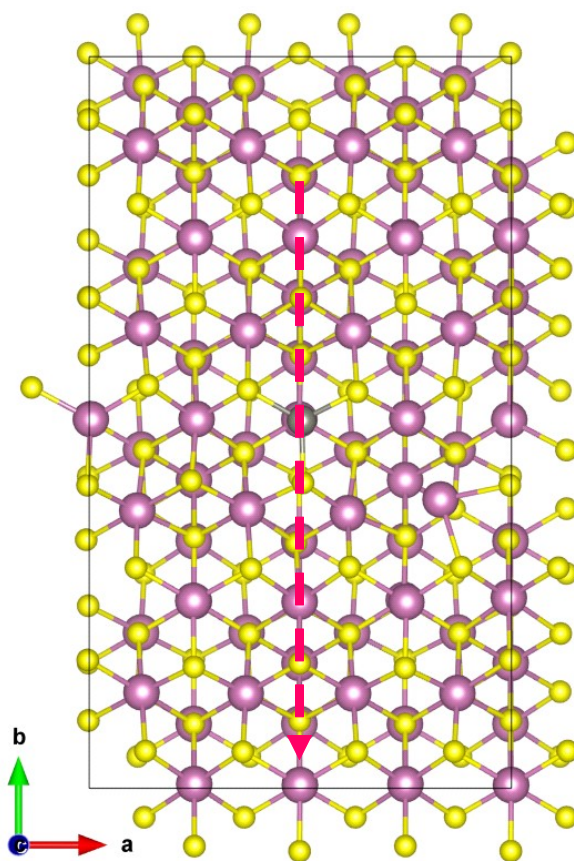

**Fig. S7** Atomic model diagram for surface electrostatic potential over Zn-In<sub>2-x</sub>S<sub>3</sub>.

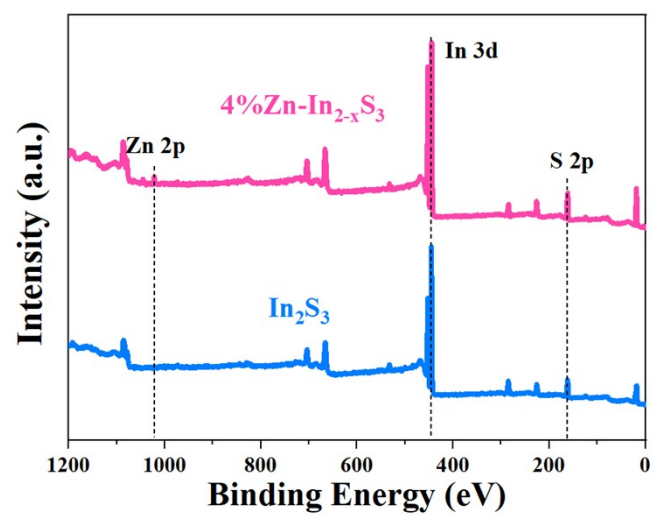

**Fig. S8** XPS spectra of full spectrum for In<sub>2</sub>S<sub>3</sub> and 4%Zn-In<sub>2-x</sub>S<sub>3</sub>.



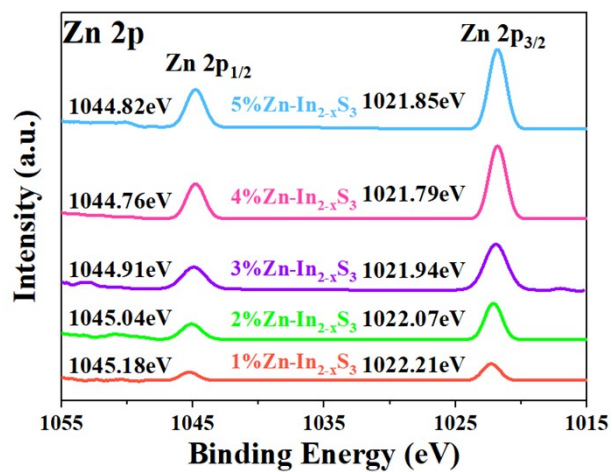

**Fig. S9** High resolution XPS spectra of Zn 2p over  $x\text{Zn-In}_{2-x}\text{S}_3$  ( $x = 1\% \sim 5\%$ ).

**Table S2.** XPS fitting data of area of elements, Zn atomic concentrations, the atomic ratios of S to In and V<sub>s</sub> concentrations. The RSF (relative sensitivity factor) for Zn 2p, In 3d and S 2p are 5.589, 7.265 and 0.668 respectively.

| Samples                                               | Elements | Area/(T*<br>MFP) | Area/(RSF<br>*T*MFP) | Zn atom<br>concentrations<br>& | S :<br>(In + Zn)* | Vs<br>Concentrations <sup>#</sup> |
|-------------------------------------------------------|----------|------------------|----------------------|--------------------------------|-------------------|-----------------------------------|
| In <sub>2</sub> S <sub>3</sub>                        | In 3d    | 112097.85        | 15429.8493           | 0.00%                          | 1.49              | 0.81%                             |
|                                                       | S 2p     | 15335.1          | 22956.7365           |                                |                   |                                   |
| 1%Zn-In <sub>2</sub><br>- <sub>x</sub> S <sub>3</sub> | In 3d    | 198143.20        | 27273.6691           | 0.20%                          | 1.47              | 1.88%                             |
|                                                       | S 2p     | 26946.15         | 40338.5479           |                                |                   |                                   |
|                                                       | Zn 2p    | 754.5            | 134.997316           |                                |                   |                                   |
| 2%Zn-In <sub>2</sub><br>- <sub>x</sub> S <sub>3</sub> | In 3d    | 108815.68        | 14978.0713           | 0.46%                          | 1.46              | 2.61%                             |
|                                                       | S 2p     | 14784.45         | 22132.4101           |                                |                   |                                   |
|                                                       | Zn 2p    | 966.9            | 173.000536           |                                |                   |                                   |
| 3%Zn-In <sub>2</sub><br>- <sub>x</sub> S <sub>3</sub> | In 3d    | 102982.85        | 14175.2035           | 1.08%                          | 1.43              | 4.92%                             |
|                                                       | S 2p     | 13869.6          | 20762.8742           |                                |                   |                                   |
|                                                       | Zn 2p    | 2140.95          | 383.064949           |                                |                   |                                   |
| 4%Zn-In <sub>2</sub><br>- <sub>x</sub> S <sub>3</sub> | In 3d    | 116921.52        | 16093.8091           | 1.93%                          | 1.38              | 8.27%                             |
|                                                       | S 2p     | 15503.7          | 23209.1317           |                                |                   |                                   |
|                                                       | Zn 2p    | 4327.5           | 774.288781           |                                |                   |                                   |
| 5%Zn-In <sub>2</sub><br>- <sub>x</sub> S <sub>3</sub> | In 3d    | 103702.52        | 14274.2630           | 2.31%                          | 1.44              | 4.11%                             |
|                                                       | S 2p     | 14533.35         | 21756.5119           |                                |                   |                                   |
|                                                       | Zn 2p    | 4758.3           | 851.368760           |                                |                   |                                   |

The calculation method for V<sub>s</sub> concentrations:

$$\text{Atomic concentration of Zn} = \frac{Area_{Zn}}{Area_{Zn} + Area_{In} + Area_S}$$

$$S/(In + Zn) = \frac{Area_S}{Area_{In} + Area_{Zn}} \quad \text{Area: Area(RSF*T*MFP) of corresponding elements}$$

$$Vs \text{ concentrations}^{\#} (\%) = \frac{S:In(In_2S_3) - S:(Zn + In)(xIn_{2-x}S_3)}{S:In(In_2S_3)}$$

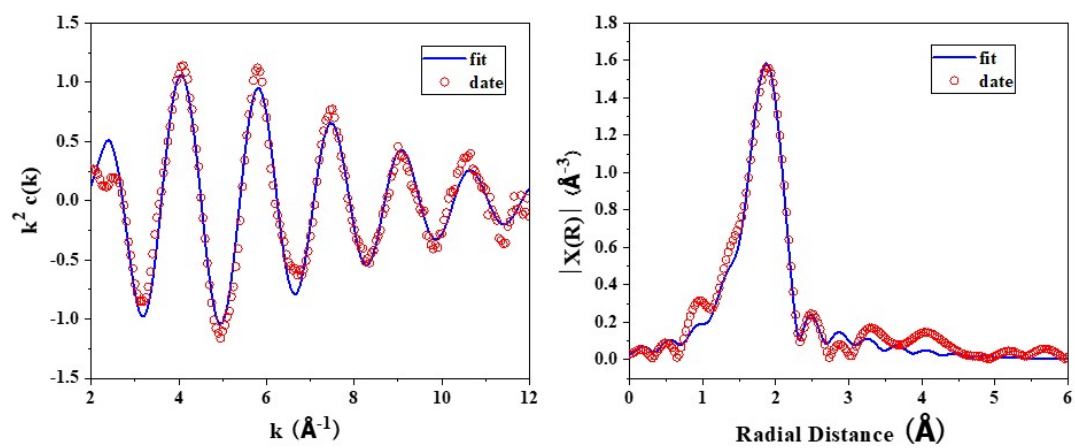

**Fig. S10** Zn K-edge EXAFS fitting results of 4%Zn-In<sub>2-x</sub>S<sub>3</sub>.

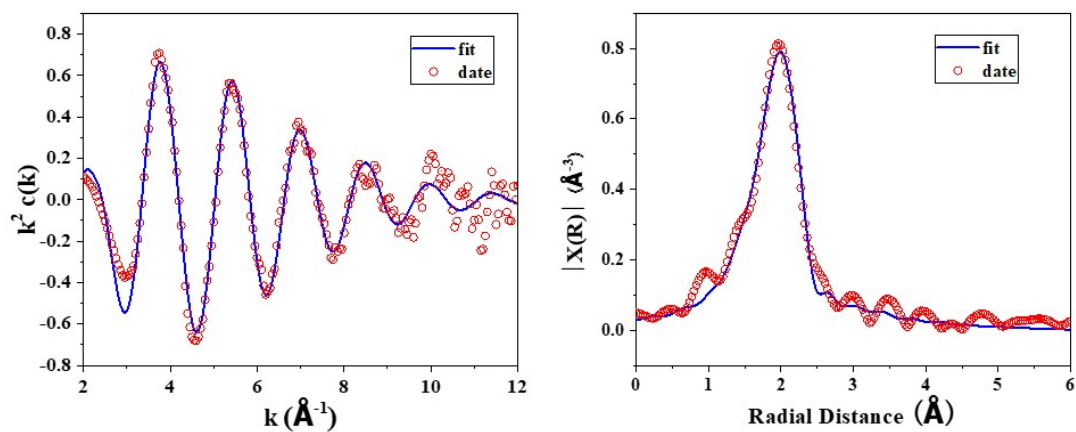

**Fig. S11** In L-edge EXAFS fitting results of  $\text{In}_2\text{S}_3$ .

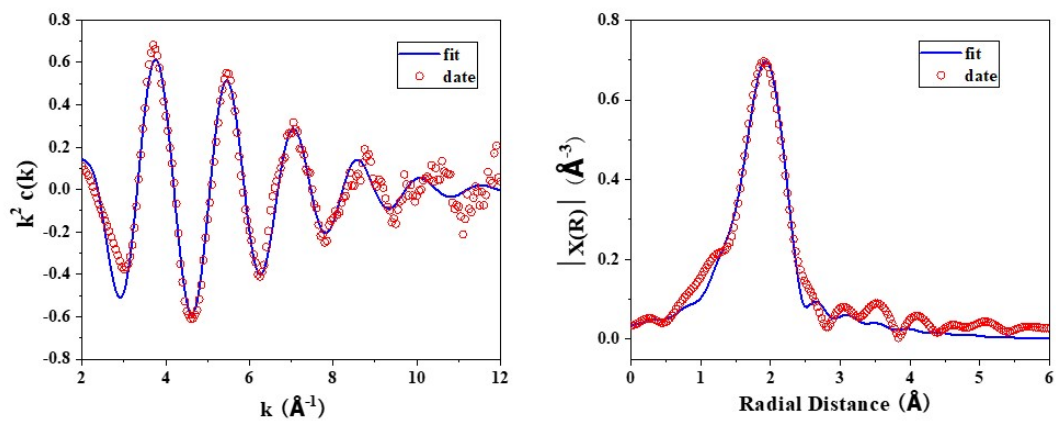

**Fig. S12** In L-edge EXAFS fitting results of 4%Zn-In<sub>2-x</sub>S<sub>3</sub>.

**Table S3.** Fitting parameters for Zn K-edge and In L-edge EXAFS for the sample.

| Sample                              | Shell  | $CN^a$  | $R(\text{\AA})^b$ | $\sigma^2(\text{\AA}^2)^c$ | $\Delta E_\theta(\text{eV})^d$ | $S_0^2$                | R factor |
|-------------------------------------|--------|---------|-------------------|----------------------------|--------------------------------|------------------------|----------|
| Zn foil                             | Zn-Zn  | 6 (set) | 2.64              | 0.011                      | -0.9±0.5                       | 0.8105<br>(calculated) | 0.015    |
| ZnS                                 | Zn-S   | 4.2±0.2 | 2.34              | 0.006                      | 4.2±0.5                        | 0.8105(set)            | 0.017    |
| 4%Zn-In <sub>2</sub> S <sub>3</sub> | Zn-S   | 4.0±0.1 | 2.33              | 0.006                      | 2.2±0.4                        | 0.8105(set)            | 0.011    |
| In foil                             | In-In  | 4 (set) | 3.45              | 0.024                      | 2.1±0.1                        | 0.9024<br>(calculated) | 0.003    |
|                                     | In-In2 | 8 (set) | 3.22              | 0.022                      |                                |                        |          |
| In <sub>2</sub> S <sub>3</sub>      | In-S   | 5.8±0.2 | 2.55              | 0.013                      | 1.6±0.3                        | 0.9024(set)            | 0.015    |
| 4%Zn-In <sub>2</sub> S <sub>3</sub> | In-S   | 5.5±0.2 | 2.52              | 0.014                      | -0.8±0.3                       | 0.9024(set)            | 0.015    |

<sup>a</sup> $CN$ , coordination number; <sup>b</sup> $R$ , the distance to the neighboring atom; <sup>c</sup> $\sigma^2$ , the Mean Square Relative Displacement (MSRD); <sup>d</sup> $\Delta E_0$ , inner potential correction;  $R$  factor indicates the goodness of the fit.  $S_0^2$  was fixed to 0.8081, according to the experimental EXAFS fit of the sample foil by fixing  $CN$  as the known crystallographic value. This value was fixed during EXAFS fitting, based on the known structure of In foil. Data ranges  $3.0 \leq k \leq 10.0 \text{ \AA}^{-1}$ ,  $1.0 \leq R \leq 3.0 \text{ \AA}$ . The Debye-Waller factors and  $\Delta R$ s are based on the *guessing* parameters and constrained for paths.

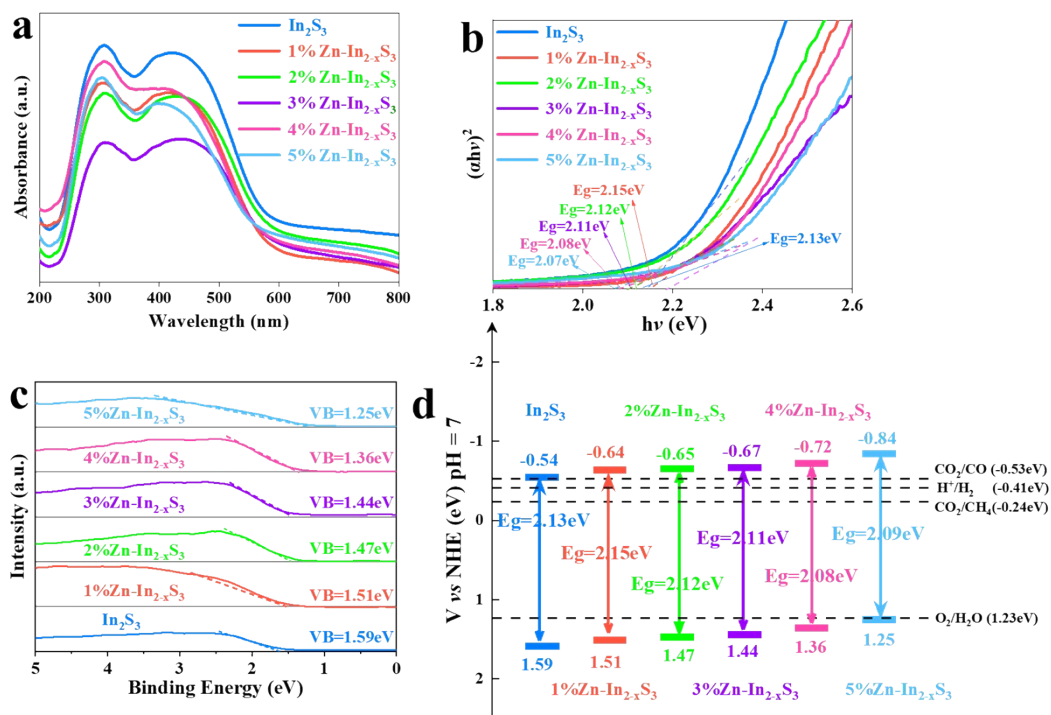

**Fig. S13** (a) UV-vis DRS spectra, (b)  $(\alpha h\nu)^2$  versus  $(h\nu)$  plots, (c) Valence band spectra of X-ray photoelectron spectroscopy and (d) Band structures of  $\text{In}_2\text{S}_3$  and  $\text{xZn-In}_{2-\text{x}}\text{S}_3$  (x=1% ~ 5%).

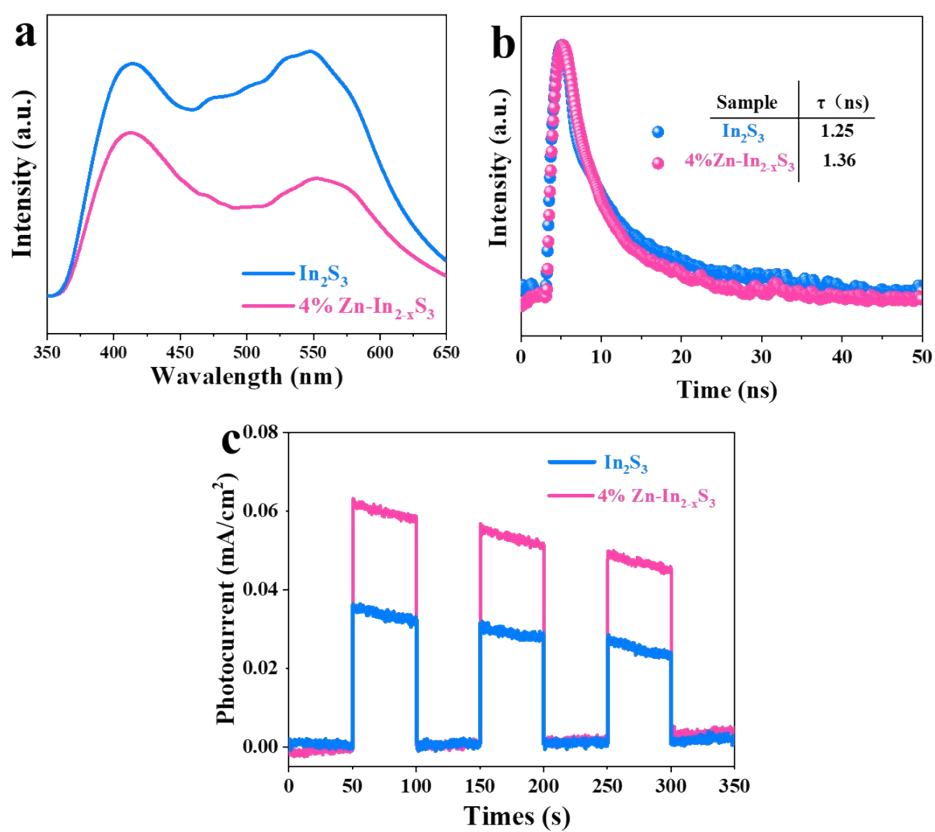

**Fig. S14** (a) PL spectra, TRPL spectra and (c) Photocurrent response of  $\text{In}_2\text{S}_3$  and  $4\%\text{Zn-In}_{2-x}\text{S}_3$ .



**Table S4.** The PL lifetime of In<sub>2</sub>S<sub>3</sub> and 1-6%Zn-In<sub>2-x</sub>S<sub>3</sub>.

| sample<br>Parameters | In <sub>2</sub> S <sub>3</sub> | 1%Zn-<br>In <sub>2-x</sub> S <sub>3</sub> | 2%Zn-<br>In <sub>2-x</sub> S <sub>3</sub> | 3%Zn-<br>In <sub>2-x</sub> S <sub>3</sub> | 4%Zn-<br>In <sub>2-x</sub> S <sub>3</sub> | 5%Zn-<br>In <sub>2-x</sub> S <sub>3</sub> | 6%Zn-<br>In <sub>2-x</sub> S <sub>3</sub> |
|----------------------|--------------------------------|-------------------------------------------|-------------------------------------------|-------------------------------------------|-------------------------------------------|-------------------------------------------|-------------------------------------------|
| $\tau_1(\text{ns})$  | 0.2173                         | 0.1983                                    | 0.3834                                    | 0.2262                                    | 0.2373                                    | 0.1986                                    | 0.2785                                    |
| $\tau_2(\text{ns})$  | 1.4836                         | 1.3141                                    | 1.2396                                    | 1.1497                                    | 1.0168                                    | 1.1726                                    | 1.9517                                    |
| $\tau_3(\text{ns})$  | 7.2247                         | 6.1418                                    | 7.7928                                    | 6.2869                                    | 7.5325                                    | 5.1024                                    | 11.422                                    |
|                      |                                |                                           |                                           |                                           |                                           |                                           | 3                                         |
| $A_1$                | 0.413                          | 0.434                                     | 0.229                                     | 0.36                                      | 0.266                                     | 0.459                                     | 0.344                                     |
| $A_2$                | 0.002                          | 0.02                                      | 0.032                                     | 0.031                                     | 0.065                                     | 0.016                                     | 0.01                                      |
| $A_3$                | 0.002                          | 0.002                                     | 0.001                                     | 0.001                                     | 0.002                                     | 0.001                                     | 0                                         |
| $\tau_A(\text{ns})$  | 1.25                           | 1.01                                      | 1.06                                      | 0.80                                      | 1.36                                      | 0.58                                      | 0.56                                      |

# The calculated formula:

$$\tau_A = \frac{A_1\tau_1^2 + A_2\tau_2^2 + A_3\tau_3^2}{A_1\tau_1 + A_2\tau_2 + A_3\tau_3}$$

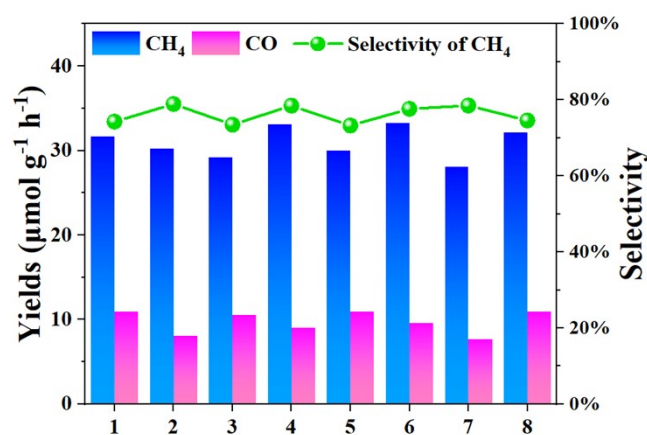

**Fig. S16** The  $\text{CH}_4$  selectivity and the yields of  $\text{CH}_4$  and  $\text{CO}$  over  $4\%\text{Zn-In}_{2-x}\text{S}_3$  (1mg catalyst dispersed in 6 mL water), which were obtained from 8 parallel experiments.

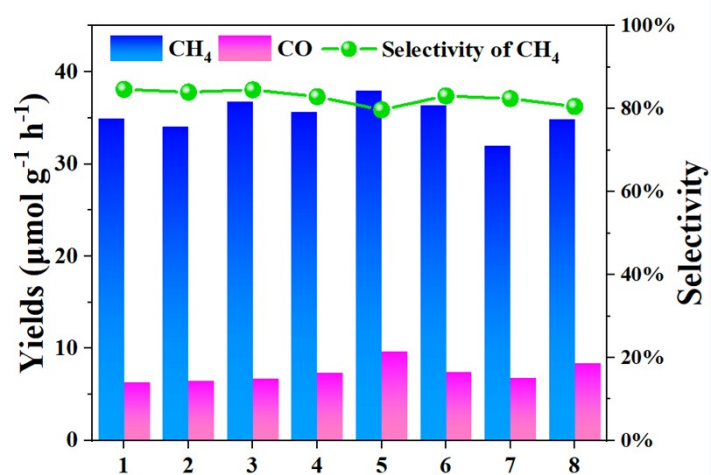

**Fig. S17** The CH<sub>4</sub> selectivity and the yields of CH<sub>4</sub> and CO over 4%Zn-In<sub>2-x</sub>S<sub>3</sub> (2mg catalyst dispersed in 6 mL water), which were obtained from 8 parallel experiments.

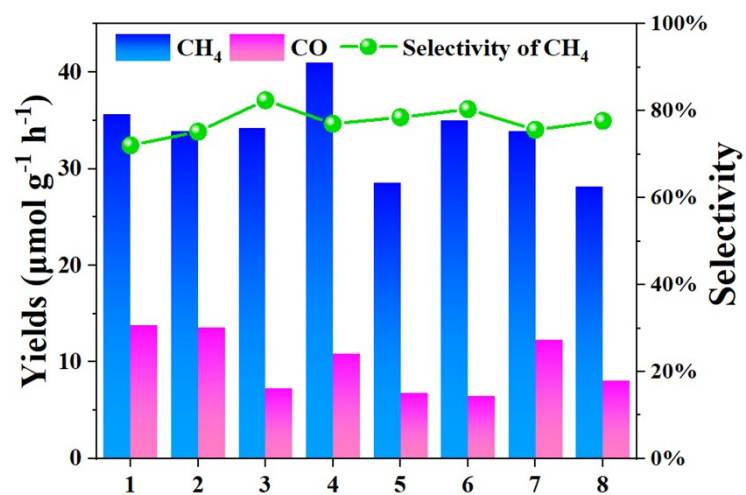

**Fig. S18** The CH<sub>4</sub> selectivity and the yields of CH<sub>4</sub> and CO over 4%Zn–In<sub>2-x</sub>S<sub>3</sub> (3mg catalyst dispersed in 6 mL water), which were obtained from 8 parallel experiments.

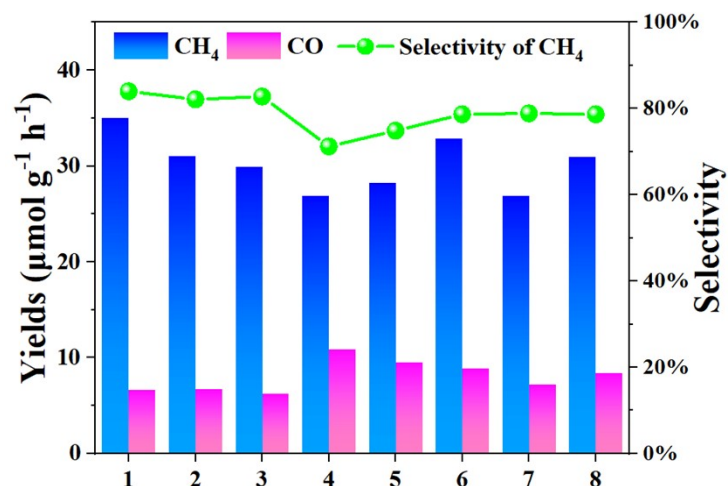

**Fig. S19** The  $\text{CH}_4$  selectivity and the yields of  $\text{CH}_4$  and  $\text{CO}$  over 4%Zn- $\text{In}_{2-x}\text{S}_3$  (1mg catalyst dispersed in 6 mL water), which were obtained from 8 parallel experiments.

**Table S5.** The different partial pressure ratios of Ar/CO<sub>2</sub>.

|   | CO <sub>2</sub> Volume | Ar Volume | partial pressure ratios<br>of Ar/CO <sub>2</sub> |
|---|------------------------|-----------|--------------------------------------------------|
| 1 | 50ml                   | 5ml       | 0.1atm                                           |
| 2 | 50ml                   | 10ml      | 0.2atm                                           |
| 3 | 50ml                   | 15ml      | 0.3atm                                           |
| 4 | 50ml                   | 20ml      | 0.4atm                                           |
| 5 | 50ml                   | 25ml      | 0.5atm                                           |
| 6 | 50ml                   | 30ml      | 0.6atm                                           |
| 7 | 50ml                   | 36ml      | 0.7atm                                           |
| 8 | 50ml                   | 40ml      | 0.8atm                                           |

**Table S6.** Performance comparison with other sulfur-based catalysts for photocatalytic CO<sub>2</sub> reduction reaction without sacrificial agents. (RT: Room Temperature)

| Catalysts                                                       | Light source                                        | Reaction medium           | Products and yields                                                                                                                                                               | Selectivity of CH <sub>4</sub> | Reference |
|-----------------------------------------------------------------|-----------------------------------------------------|---------------------------|-----------------------------------------------------------------------------------------------------------------------------------------------------------------------------------|--------------------------------|-----------|
| 4%Zn-In <sub>2-x</sub> S <sub>3</sub>                           | 300 W Xe lamp<br>( $\lambda > 420\text{nm}$ )       | H <sub>2</sub> O(l), RT   | CH <sub>4</sub> (50.7 $\mu\text{mol g}^{-1}\text{h}^{-1}$ )<br>CO (4.2 $\mu\text{mol g}^{-1}\text{h}^{-1}$ )                                                                      | 92.3%                          | This work |
| MoS <sub>2</sub> /In <sub>2</sub> S <sub>3</sub>                | 300 W Xe lamp<br>(300< $\lambda$ <700nm)            | H <sub>2</sub> O(l), RT   | CH <sub>4</sub> (68.41 $\mu\text{mol g}^{-1}\text{h}^{-1}$ )<br>CO (10.09 $\mu\text{mol g}^{-1}\text{h}^{-1}$ )<br>CH <sub>3</sub> OH (6.66 $\mu\text{mol g}^{-1}\text{h}^{-1}$ ) | 80.3%                          | Ref.1     |
| Fe/SiC                                                          | 300 W Xe lamp<br>( $\lambda > 420\text{nm}$ )       | Gas-solid,<br>water, 298K | CH <sub>4</sub> (28.3 $\mu\text{mol g}^{-1}\text{h}^{-1}$ )<br>CO (1.7 $\mu\text{mol g}^{-1}\text{h}^{-1}$ )                                                                      | 94.3%                          | Ref.2     |
| UiO-66/Co <sub>9</sub> S <sub>8</sub>                           | 300 W Xe lamp<br>(AM 1.5G and cut<br>800 nm filter) | H <sub>2</sub> O(l), RT   | CH <sub>4</sub> (25.7 $\mu\text{mol g}^{-1}\text{h}^{-1}$ )                                                                                                                       | 100%                           | Ref.3     |
| CuSnInS <sub>4</sub>                                            | 300 W Xe lamp<br>( $\lambda > 420\text{nm}$ )       | Gas-solid,<br>water, RT   | CH <sub>4</sub> (5.83 $\mu\text{mol g}^{-1}\text{h}^{-1}$ )<br>CO (2.4 $\mu\text{mol g}^{-1}\text{h}^{-1}$ )                                                                      | 67.3%                          | Ref.4     |
| 1%Pt/CuInSnS <sub>4</sub>                                       | 300 W Xe lamp<br>( $\lambda > 420\text{nm}$ )       | Gas-solid,<br>water, RT   | CH <sub>4</sub> (43.25 $\mu\text{mol g}^{-1}\text{h}^{-1}$ )<br>CO (7.85 $\mu\text{mol g}^{-1}\text{h}^{-1}$ )                                                                    | 84.6%                          | Ref.4     |
| 10%CoO/CuInSnS <sub>4</sub>                                     | 300 W Xe lamp<br>( $\lambda > 420\text{nm}$ )       | Gas-solid,<br>water, RT   | CH <sub>4</sub> (33.3 $\mu\text{mol g}^{-1}\text{h}^{-1}$ )<br>CO (9.36 $\mu\text{mol g}^{-1}\text{h}^{-1}$ )                                                                     | 78.1%                          | Ref.4     |
| 10%NiO/CuInSnS <sub>4</sub>                                     | 300 W Xe lamp<br>( $\lambda > 420\text{nm}$ )       | Gas-solid,<br>water, RT   | CH <sub>4</sub> (11.8 $\mu\text{mol g}^{-1}\text{h}^{-1}$ )<br>CO (6.85 $\mu\text{mol g}^{-1}\text{h}^{-1}$ )                                                                     | 63.3%                          | Ref.4     |
| 5%Co(OH) <sub>2</sub> /<br>CuInSnS <sub>4</sub>                 | 300 W Xe lamp<br>( $\lambda > 420\text{nm}$ )       | Gas-solid,<br>water, RT   | CH <sub>4</sub> (145.45 $\mu\text{mol g}^{-1}\text{h}^{-1}$ )<br>CO (32.32 $\mu\text{mol g}^{-1}\text{h}^{-1}$ )                                                                  | 81.8%                          | Ref.4     |
| 5%Co(OH) <sub>2</sub> /<br>CuInSnS <sub>4</sub> /1%Pt           | 300 W Xe lamp<br>( $\lambda > 420\text{nm}$ )       | Gas-solid,<br>water, RT   | CH <sub>4</sub> (195.6 $\mu\text{mol g}^{-1}\text{h}^{-1}$ )<br>CO (22.0 $\mu\text{mol g}^{-1}\text{h}^{-1}$ )                                                                    | 89.9%                          | Ref.4     |
| CuS@ZnIn <sub>2</sub> S <sub>4</sub> /<br>C60                   | 300 W Xe lamp<br>( $\lambda > 400\text{nm}$ )       | Gas-solid,<br>water, 25°C | CH <sub>4</sub> (43.6 $\mu\text{mol g}^{-1}\text{h}^{-1}$ )<br>CO (6.4 $\mu\text{mol g}^{-1}\text{h}^{-1}$ )                                                                      | 87.2%                          | Ref.5     |
| Pd <sub>1</sub> +NP <sub>8</sub> /C <sub>3</sub> N <sub>4</sub> | Xe lamp<br>(250mW cm <sup>-2</sup> )                | H <sub>2</sub> O(l), RT   | CH <sub>4</sub> (20.3 $\mu\text{mol g}^{-1}\text{h}^{-1}$ )<br>CO (0.46 $\mu\text{mol g}^{-1}\text{h}^{-1}$ )                                                                     | 97.8%                          | Ref.6     |
| black<br>Nb <sub>2</sub> O <sub>5-x</sub> NFs                   | 300 W Xe lamp<br>( $\lambda > 420\text{nm}$ )       | H <sub>2</sub> O(l), RT   | CH <sub>4</sub> (19.5 $\mu\text{mol g}^{-1}\text{h}^{-1}$ )<br>CO (10.6 $\mu\text{mol g}^{-1}\text{h}^{-1}$ )                                                                     | 64.8%                          | Ref.7     |
| Au <sub>SA</sub> /Cd <sub>1-x</sub> S                           | 300 W Xe lamp<br>(UV-vis)                           | Gas-solid,<br>water, RT   | CH <sub>4</sub> (11.3 $\mu\text{mol g}^{-1}\text{h}^{-1}$ )<br>CO (32.2 $\mu\text{mol g}^{-1}\text{h}^{-1}$ )                                                                     | 22.0%                          | Ref.8     |
| Au <sub>SA</sub> /CdS <sub>1-x</sub>                            | 300 W Xe lamp<br>(UV-vis)                           | Gas-solid,<br>water, RT   | CH <sub>4</sub> (0.40 $\mu\text{mol g}^{-1}\text{h}^{-1}$ )<br>CO (3.70 $\mu\text{mol g}^{-1}\text{h}^{-1}$ )                                                                     | 9.3%                           | Ref.8     |
| Ni-doped CoS <sub>2</sub><br>nanosheets                         | 300 W Xe lamp<br>(AM 1.5G and cut                   | Gas-solid,<br>water, RT   | CH <sub>4</sub> (101.8 $\mu\text{mol g}^{-1}\text{h}^{-1}$ )<br>CO (1.7 $\mu\text{mol g}^{-1}\text{h}^{-1}$ )                                                                     | ~73.1%                         | Ref.9     |

| 800 nm filter)                                     |                                        |                           | CO (37.5 $\mu$ mol g <sup>-1</sup> h <sup>-1</sup> )                                                                                                                                              |       |        |
|----------------------------------------------------|----------------------------------------|---------------------------|---------------------------------------------------------------------------------------------------------------------------------------------------------------------------------------------------|-------|--------|
| Ag <sub>2</sub> S-In <sub>2</sub> S <sub>3</sub>   | 300 W Xe lamp<br>(AM 1.5G)             | Gas-solid,<br>water, 298K | CH <sub>4</sub> (20 $\mu$ mol g <sup>-1</sup> h <sup>-1</sup> )<br>CO (25.1 $\mu$ mol g <sup>-1</sup> h <sup>-1</sup> )                                                                           | 44.3% | Ref.10 |
| In <sub>4</sub> SnS <sub>8</sub>                   | 300 W Xe lamp<br>( $\lambda > 420$ nm) | Gas-solid,<br>water, RT   | CH <sub>4</sub> (23.88 $\mu$ mol g <sup>-1</sup> h <sup>-1</sup> )<br>CO (20.96 $\mu$ mol g <sup>-1</sup> h <sup>-1</sup> )                                                                       | 57.0% | Ref.11 |
| TiO <sub>2</sub> @ZnIn <sub>2</sub> S <sub>4</sub> | 300 W Xe lamp                          | Gas-solid,<br>water, RT   | CH <sub>4</sub> (4.26 $\mu$ mol g <sup>-1</sup> h <sup>-1</sup> )<br>CO (9.28 $\mu$ mol g <sup>-1</sup> h <sup>-1</sup> )<br>CH <sub>3</sub> OH (4.78 $\mu$ mol g <sup>-1</sup> h <sup>-1</sup> ) | 23.3% | Ref.12 |



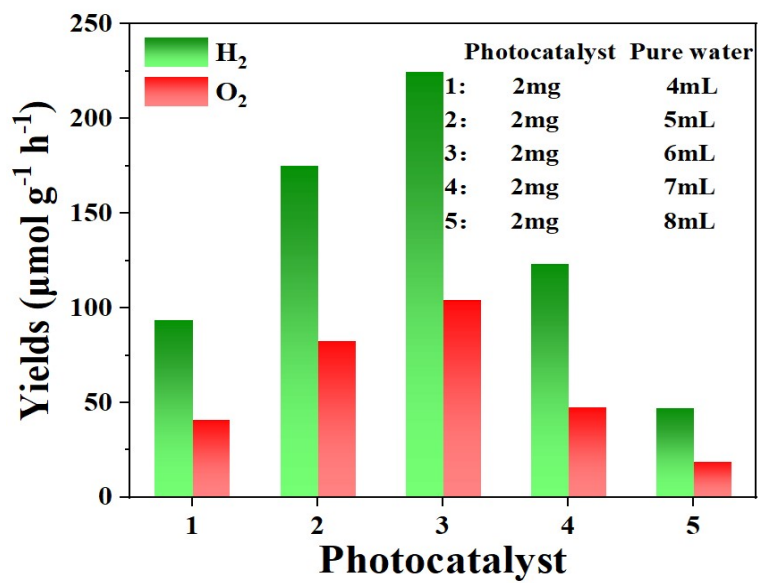

**Fig. S20** The effect of dispersion concentrations of photocatalyst on photocatalytic performance of water splitting of 4%  $\text{Zn-In}_{2-x}\text{S}_3$  (photocatalyst: 2mg,  $\text{H}_2\text{O}$ : in 4 ~ 8mL).

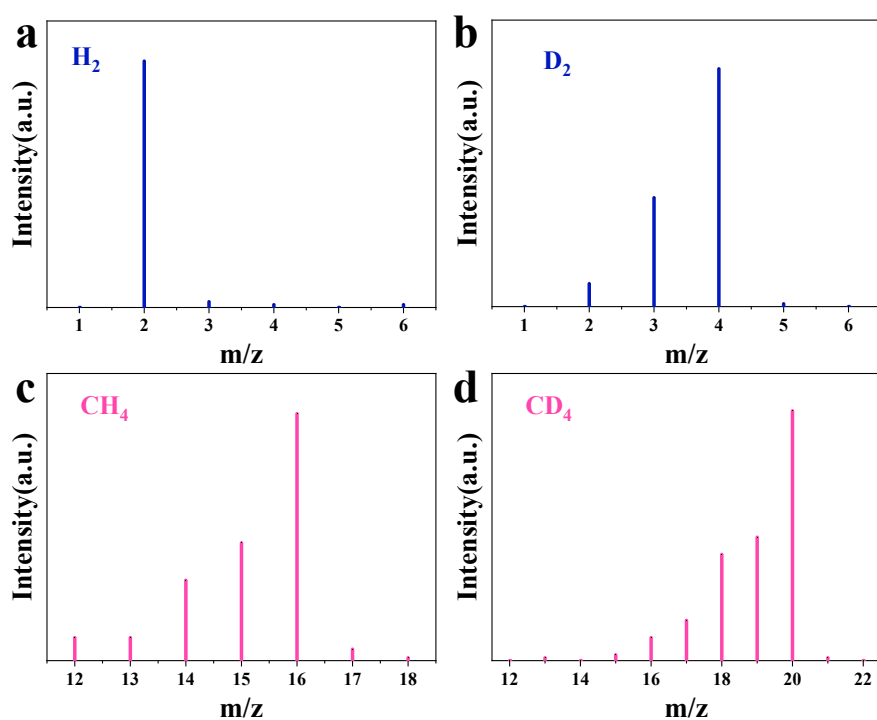

**Fig. S21** Mass spectra of (a)  $H_2$  ( $m/z=2$ ) and (b)  $D_2$  ( $m/z=4$ ) produced by 4%Zn-In<sub>2-x</sub>S<sub>3</sub> photocatalysts during the water splitting reaction when  $H_2O$  and  $D_2O$  are used as proton sources, respectively. Mass spectra of (c)  $CH_4$  and (d)  $CD_4$  produced by 4%Zn-In<sub>2-x</sub>S<sub>3</sub> photocatalyst during  $CO_2$  reduction reaction using  $H_2O$  and  $D_2O$  as proton sources, respectively.

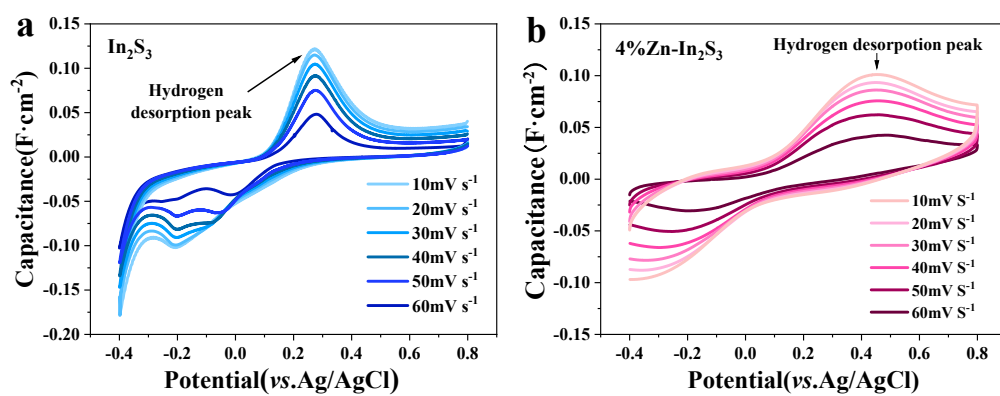

**Fig. S22** Cyclic voltammetry of (a)  $\text{In}_2\text{S}_3$  and (b)  $4\%\text{Zn-In}_{2-x}\text{S}_3$  in Ar-saturated  $0.5\text{M}$   $\text{H}_2\text{SO}_4$  with a scan rate of  $10\sim 60\text{mV s}^{-1}$ .

**Table S7.** Intermediate product processes of H<sub>2</sub>O adsorption and activation, and CO<sub>2</sub> hydrogenation and conversion over In<sub>2</sub>S<sub>3</sub>.

| In <sub>2</sub> S <sub>3</sub>                                                      | *+H <sub>2</sub> O                                                                  | *H <sub>2</sub> O                                                                    | *H                                                                                    |
|-------------------------------------------------------------------------------------|-------------------------------------------------------------------------------------|--------------------------------------------------------------------------------------|---------------------------------------------------------------------------------------|
| 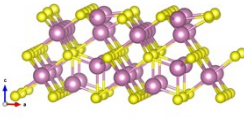   |    |    |    |
| *H + CO <sub>2</sub>                                                                | *COOH                                                                               | *CO                                                                                  |                                                                                       |
|    |    |    |                                                                                       |
| *COOH-Ha                                                                            | *COOH-Hb                                                                            | *CHOOH                                                                               | *CHO                                                                                  |
|    |    |    |    |
| *CH <sub>2</sub> O                                                                  | *CH <sub>3</sub> O                                                                  | *O                                                                                   | *OH                                                                                   |
|  |  |  |  |

**Table S8.** Intermediate product processes of H<sub>2</sub>O adsorption and activation, and CO<sub>2</sub> hydrogenation and conversion over 4%Zn-In<sub>2-x</sub>S<sub>3</sub>

| 4% Zn-In <sub>2-x</sub> S <sub>3</sub>                                             | *+H <sub>2</sub> O                                                                 | *H <sub>2</sub> O                                                                   | *H                                                                                   |
|------------------------------------------------------------------------------------|------------------------------------------------------------------------------------|-------------------------------------------------------------------------------------|--------------------------------------------------------------------------------------|
| 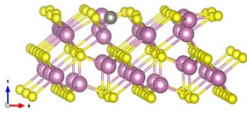  |   |   |   |
| *H + CO <sub>2</sub>                                                               | *COOH                                                                              | *CO                                                                                 |                                                                                      |
|   |   |   |                                                                                      |
| *COOH-Ha                                                                           | *COOH-Hb                                                                           | *CHOOH                                                                              | *CH <sub>2</sub> OOH                                                                 |
|   |   |   |   |
| *CH <sub>2</sub> O                                                                 | *CH <sub>3</sub> O                                                                 | *O                                                                                  | *OH                                                                                  |
|  |  |  |  |

**Fig. S23** The infrared thermal images of different photocatalyst sample with increasing irradiation time (0 ~ 3 min). (20 mg photocatalyst, 300W Xenon lamps,  $\lambda > 420$  nm, the distance between powders and light: 10 cm)

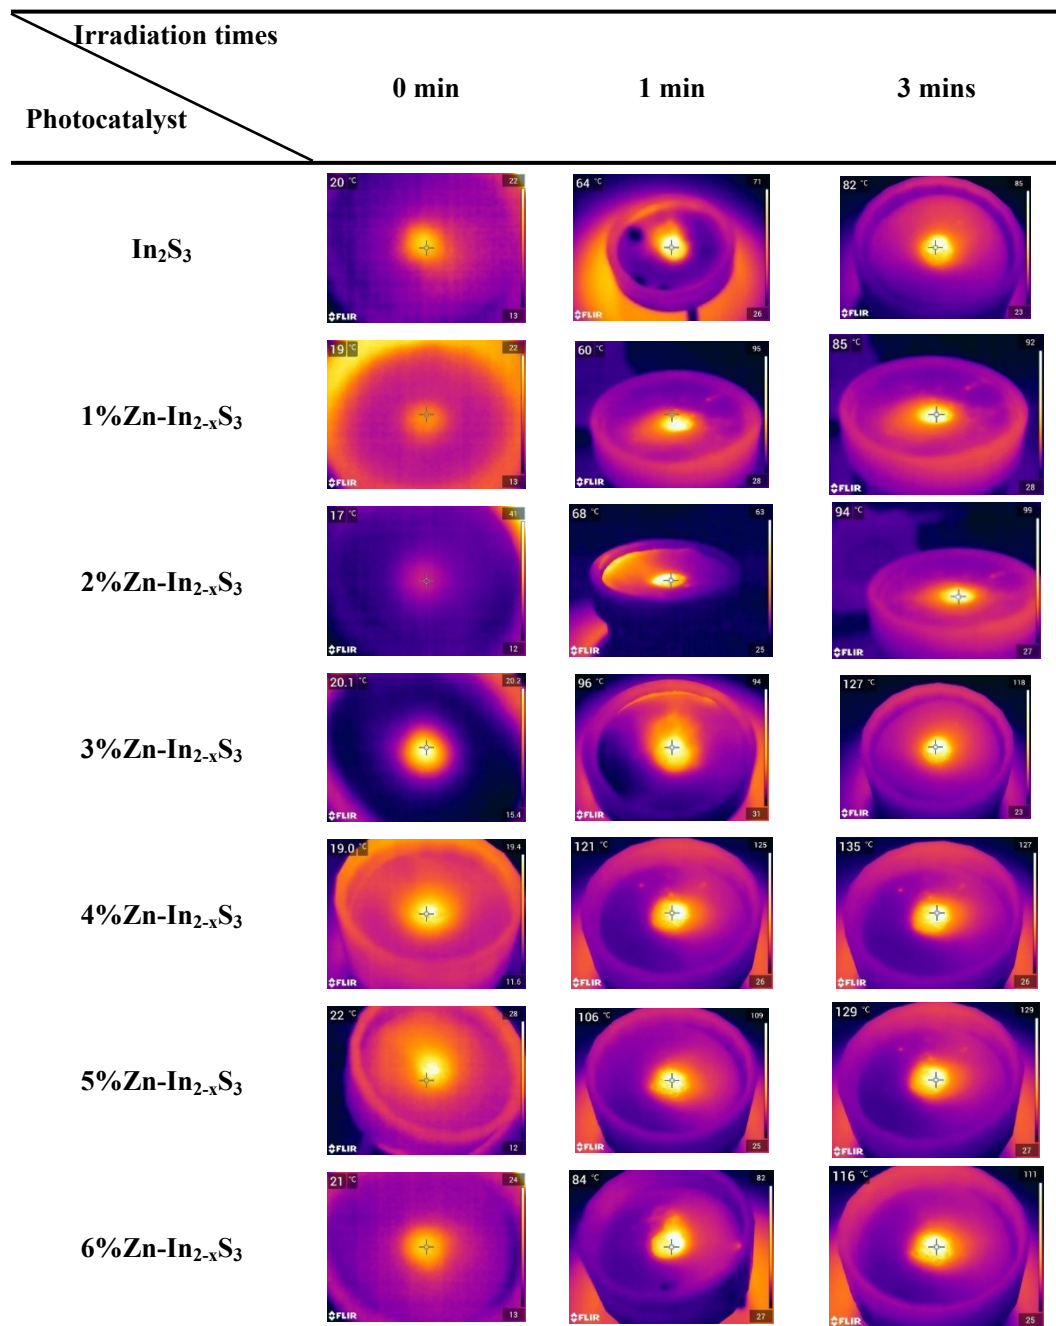

## References

- [1] Cai, W.; Qian, Z.; Hu, C.; Zheng, W.; Luo, L.; Zhao, Y. Systematic investigation of MoS<sub>2</sub>-metal sulfides (Metal = In, Sn, Cu, Cd) heterostructure via metal-sulfur bond for photocatalytic CO<sub>2</sub> reduction. *Chem. Eng. J.* 2024, 479, 147718.
- [2] Lin, Q.; Zhao, J.; Zhang, P.; Wang, S.; Wang, Y.; Zhang, Z.; Wen, N.; Ding, Z.; Yuan, R.; Wang, X.; Long, J. Highly selective photocatalytic reduction of CO<sub>2</sub> to CH<sub>4</sub> on electron-rich Fe species cocatalyst under visible light irradiation. *Carbon Energy*, 2024, 6, e435.
- [3] Yang, S.; Byun, W. J.; Zhao, F.; Chen, D.; Mao, J.; Zhang, W.; Peng, J.; Liu, C.; Pan, Y.; Hu, J.; Zhu, J.; Zheng, X.; Fu, H.; Yuan, M.; Chen, H.; Li, R.; Zhou, M.; Che, W.; Back, J. B.; Lee, J. S.; Xu, J. CO<sub>2</sub> enrichment boosts highly selective infrared-light-driven CO<sub>2</sub> conversion to CH<sub>4</sub> by UiO-66/Co<sub>9</sub>S<sub>8</sub> photocatalyst. *Adv. Mater.* 2024, 36, 2312616.
- [4] Chai, Y.; Kong, Y.; Lin, M.; Lin, W.; Shen, J.; Long, J.; Yuan, R.; Dai, W.; Wang, X.; Zhang, Z. Metal to non-metal sites of metallic sulfides switching products from CO to CH<sub>4</sub> for photocatalytic CO<sub>2</sub> reduction. *Nat. Commun.* 2023, 14, 6168.
- [5] Ding, Y.; Chen, Y.; Guan, Z.; Zhao, Y.; Lin, J.; Jiao, Y.; Tian, G. Hierarchical CuS@ZnIn<sub>2</sub>S<sub>4</sub> hollow double-shelled p–n heterojunction octahedra decorated with fullerene C60 for remarkable selectivity and activity of CO<sub>2</sub> photoreduction into CH<sub>4</sub>. *ACS Appl. Mater. Interfaces* 2022, 14, 7888–7899.
- [6] Liu, P.; Huang, Z.; Gao, X.; Hong, X.; Zhu, J.; Wang, G.; Wu, Y.; Zeng, J.; Zheng, X. Synergy between palladium single atoms and nanoparticles via hydrogen spillover for enhancing CO<sub>2</sub> photoreduction to CH<sub>4</sub>. *Adv. Mater.* 2022, 34, 2200057.
- [7] Lin, X.; Xia, S.; Zhang, L.; Zhang, Y.; Sun, S.; Chen, Y.; Chen, S.; Ding, B.; Yu, J.; Yan, J. Fabrication of flexible mesoporous black Nb<sub>2</sub>O<sub>5</sub> nanofiber films for visible-light-driven photocatalytic CO<sub>2</sub> reduction into CH<sub>4</sub>. *Adv. Mater.* 2022, 34, 2200756.
- [8] Cao, Y.; Guo, L.; Dan, M.; Doronkin D. E.; Han, C.; Rao, Z.; Liu, Y.; Meng, J.; Huang, Z.; Zheng, K.; Chen, P.; Dong, F.; Zhou, Y. Modulating electron density of vacancy site by single Au atom for effective CO<sub>2</sub> photoreduction. *Nat. commun.* 2021, 12, 1675.
- [9] Xu, J.; Ju, Z.; Zhang, W.; Pan, Y.; Zhu, J.; Mao, J.; Zheng, X.; Fu, H.; Yuan, M.; Chen, H.; Li, R. Efficient infrared-light-driven CO<sub>2</sub> reduction over ultrathin metallic Ni-doped CoS<sub>2</sub> nanosheets. *Angew. Chem. Int. Ed.* 2021, 133, 8787–8791.
- [10] Shao, W.; Wang, S.; Zhu, J.; Li, X.; Jiao, X.; Pan, Y.; Sun, Y.; Xie, Y. In-plane heterostructured Ag<sub>2</sub>S-In<sub>2</sub>S<sub>3</sub> atomic layers enabling boosted CO<sub>2</sub> photoreduction into CH<sub>4</sub>. *Nano Res.* 2021, 14, 4520–4527.
- [11] Chai, Y.; Chen, Y.; Shen, J.; Ni, M.; Wang, B.; Li, D.; Zhang, Z.; Wang, X. Distortion of the coordination structure and high symmetry of the crystal structure in In<sub>4</sub>SnS<sub>8</sub> microflowers for enhancing visible-light photocatalytic CO<sub>2</sub> reduction. *ACS Catal.* 2021, 11, 11029–11039.
- [12] Wang, L.; Cheng, B.; Zhang, L.; Yu, J. In situ irradiated XPS investigation on S-scheme TiO<sub>2</sub>@ZnIn<sub>2</sub>S<sub>4</sub> photocatalyst for efficient photocatalytic CO<sub>2</sub> reduction. *Small* 2021, 17, 2103447.
